# Supplementary material for: Nutritional Risk Factors, Microbiota and Parkinson’s Disease: What Is the Current Evidence?
Source: Nutrients. 2019 Aug 14;11(8):1896. doi: 10.3390/nu11081896 (PMC6722832; doi:10.3390/nu11081896)
Supplement: Supplementary file 1 [file nutrients-11-01896-s001.pdf]

**Table S1: Dietary fat intake and PD risk:**

| <b>Author</b>                   | <b>Study design</b>                       | <b>Population</b>                                                                | <b>Sample size</b>                                                   | <b>Factors studied</b>                                               | <b>RR/OR- 95%CI</b>                                                                  | <b>PD risk</b> |
|---------------------------------|-------------------------------------------|----------------------------------------------------------------------------------|----------------------------------------------------------------------|----------------------------------------------------------------------|--------------------------------------------------------------------------------------|----------------|
| <b>Chen et al, 2003 [12]</b>    | Prospective cohort study                  | Health Professionals Follow-up Study (HPFS) and Nurses' Health Study (NHS)       | 47,331 men and 88,563 women, 191 men PD cases and 186 women PD cases | Fat intake                                                           | SAFA (men) : 1.83 (1.10, 3.03)                                                       | +              |
| <b>Abbott et al, 2003 [16]</b>  | Prospective cohort study                  | Honolulu-Asia Aging Study                                                        | 8,006 participants, 137 cases                                        | Environmental, lifestyle, and physical attributes                    | PUFAs (men who never smoked a cigarette) p=0.042<br>No OR available                  | -              |
| <b>De Lau et al, 2005 [13]</b>  | Prospective cohort study                  | The Rotterdam Study                                                              | 5,289 participants, 51 PD cases                                      | High intake of unsaturated fatty acids                               | Total fat: 0.69 (0.52, 0.91)<br>MUFAs: 0.68 (0.50, 0.94)<br>PUFAs: 0.66 (0.46, 0.96) | -<br>-<br>-    |
| <b>Kyrozis et al, 2013 [14]</b> | Prospective cohort study                  | EPIC–Greece cohort                                                               | 26,173 participants, 88 PD cases                                     | Dietary and lifestyle variables                                      | N-6 PUFA: 0.69 (0.50, 0.98)<br>LA: 0.79 (0.60,1.04)                                  | -<br>-         |
| <b>Dong et al, 2014 [15]</b>    | Prospective cohort study                  | NIH-AARP Diet and Health Study                                                   | 299,617 controls and 1,087 PD cases                                  | Dietary fat intakes                                                  | n-6 PUFA: 1.23 (1.02, 1.49)                                                          | <b>NSR</b>     |
| <b>Kamel et al, 2014 [22]</b>   | Case-control nested within a cohort study | Farming and Movement Evaluation (FAME) nested in Agricultural Health Study (AHS) | 336 controls and 89 PD cases                                         | Dietary fat intake, altered response to environmental neurotoxicants | PUFAs: 0.4 (0.2, 0.8)<br>aLNA: 0.4 (0.2, 0.8)                                        | -<br>-         |
| <b>Kamel et al, 2014 [22]</b>   | Meta-analysis study                       | 9 studies, 3 case-controls and 6 prospective study                               | Not available                                                        | All categories of fat                                                | aLNA: 0.81 (0.68,0.96)                                                               | -              |
| <b>Tan et al, 2016 [17]</b>     | Prospective cohort study                  | Singapore Chinese Health Study                                                   | 63,257 participants, 411 PD cases                                    | Dietary fat intakes                                                  | Cholesterol: 0.53 (0.33, 0.84)                                                       | -              |

|                               |                     |                                                                    |                                                                                                                                             |                       |                                                                 |                                                                                                     |
|-------------------------------|---------------------|--------------------------------------------------------------------|---------------------------------------------------------------------------------------------------------------------------------------------|-----------------------|-----------------------------------------------------------------|-----------------------------------------------------------------------------------------------------|
|                               |                     |                                                                    |                                                                                                                                             |                       | MUFAs (women):<br>0.44 (0.22, 0.88)                             | -                                                                                                   |
| <b>Wang et al, 2015 [18]</b>  | Meta-analysis study | Pertinent studies were identified by a search of PubMed and Embase | 232, 869 participants, 1,482 PD cases                                                                                                       | Macronutrients intake | Cholesterol: 0.97 (0.75, 1.26)<br>Fat intake: 0.88 (0.74, 1.06) | <b>NSR</b><br><b>NSR</b>                                                                            |
| <b>Zhang et al, 2015 [19]</b> | Meta-analysis study | 21 cohort studies                                                  | 181,580 participants, 4,438 cases (263 mild cognitive impairment, 320 cognitive decline, 1864 dementia, 1332 Alzheimer disease, and 659 PD) | Fish and PUFA intake  | 8-g/d of PUFA intake: 0.9 (0.80, 0.99)                          | -                                                                                                   |
|                               |                     |                                                                    |                                                                                                                                             |                       |                                                                 | <b>-Decreased risk of PD</b><br><b>+ Increased risk of PD</b><br><b>NSR No Significant Relation</b> |

**Table S2: Vitamins intake and PD risk:**

| <b>Author</b>                         | <b>Study design</b>                       | <b>Population</b>   | <b>Sample size</b>                                | <b>Factors studied</b>              | <b>RR/OR-95%CI</b>           | <b>PD risk</b>                       |
|---------------------------------------|-------------------------------------------|---------------------|---------------------------------------------------|-------------------------------------|------------------------------|--------------------------------------|
| <b>Paganini-Hill et al, 2001 [36]</b> | Case-control nested within a cohort study | Southern California | 13,979 participants, 395 PD cases, 2,320 controls | Vitamin C, A intake                 | No available OR              | <b>NSR</b>                           |
| <b>Zhang et al, 2002 [21]</b>         | Prospective cohort study                  | NHS and HPFS cohort | 76890 women (NHS), 47337 men                      | Vitamin C, E and carotenoids intake | Vitamin E: 0.68 (0.49, 0.93) | <b>Higher intake of vitamin E: -</b> |

|                                 |                          |                                                                 |                                                                      |                                                          |                                                                                                                                                                                           |                                        |
|---------------------------------|--------------------------|-----------------------------------------------------------------|----------------------------------------------------------------------|----------------------------------------------------------|-------------------------------------------------------------------------------------------------------------------------------------------------------------------------------------------|----------------------------------------|
|                                 |                          |                                                                 | (HPFS)                                                               |                                                          |                                                                                                                                                                                           |                                        |
| <b>Chen et al, 2004 [26]</b>    | Prospective cohort study | NHS and HPFS cohort                                             | 47,341 men and 88,716 women, 248 PD men cases and 167 women PD cases | Vitamin B6, B9, B12 intake                               | Vitamin B6 : 1.0 (0.7, 1.4)<br>Vitamin B9 : 1.1 (0.8, 1.5)<br>Vitamin B12 : 0.8 (0.6, 1.1)                                                                                                | <b>NSR</b>                             |
| <b>Etminan et al, 2005 [38]</b> | Meta-analysis study      | 6 case control studies, 1 cohort study, 1 cross-sectional study | Not available                                                        | Beta-carotene, vitamin C, vitamin E                      | Vitamine E:<br>Moderate intake: 0.81 ( 0.67, 0.98)<br>High intake: 0.78 (0.57,1.06)<br>Vitamine C/beta-carotene                                                                           | -<br><br><b>NSR</b>                    |
| <b>De Lau et al, 2006 [2]</b>   | Prospective cohort study | The Rotterdam Study                                             | 5,289 participants, 72 PD cases                                      | Vitamin B6, B9, B12 intake                               | Vitamin B6 : 0.46 (0.22, 0.96)<br>Vitamin B9 : 0.75 (0.37, 1.49)<br>Vitamin B12 : 1.11 (0.61, 2.01)                                                                                       | -<br><br><b>NSR</b>                    |
| <b>Takeda et al, 2013 [39]</b>  | Meta-analysis study      | 8 studies (7 case-control and 1 cohort study)                   | Not available                                                        | Dietary intakes of vitamin A and carotenoids             | Vitamin A: 1.09 (0.84, 1.42)<br>$\alpha$ -Carotene: 0.84 (0.59, 1.18)<br>$\beta$ -Carotene: 0.91 (0.70, 1.20)<br>$\beta$ -Cryptoxanthin: 0.96 (0.66, 1.40)<br>Lycopene: 1.03 (0.64, 1.65) | <b>NSR</b>                             |
| <b>Hughes et al, 2016 [37]</b>  | Prospective cohort study | NHS and HPFS cohort                                             | 80,750 female (NHS)<br>48,672 men (HPFS)<br>1036 PD cases            | Intakes of antioxidant, vitamins E and C and carotenoids | Vitamin E: 0.93 (0.75, 1.14)<br>Carotenoids: 0.97 (0.69, 1.37)<br>Vitamin C: 0.81                                                                                                         | <b>NSR</b><br><b>NSR</b><br><b>NSR</b> |

|                              |                          |                                                                       |                                     |                                                                   |                                                                                                                                                                                                                                                                                   |
|------------------------------|--------------------------|-----------------------------------------------------------------------|-------------------------------------|-------------------------------------------------------------------|-----------------------------------------------------------------------------------------------------------------------------------------------------------------------------------------------------------------------------------------------------------------------------------|
|                              |                          |                                                                       | (554 in HPFS and 482 in NHS)        |                                                                   | (0.65, 1.01)                                                                                                                                                                                                                                                                      |
| <b>Yang et al, 2017 [22]</b> | Prospective cohort study | Swedish Mammography Cohort (SMC) and the Cohort of Swedish Men (COSM) | 84,774 participants, 1,329 PD cases | Vitamin C, E, beta carotene and total antioxidant capacity intake | <u>Beta carotene:</u><br>Men: 0.84 (0.84, 0.99)<br>Women: 0.86 (0.78, - 0.95)<br><u>Vitamin E:</u><br>Women: 0.87 (0.79, - 0.96)<br><u>Vitamin C:</u><br>Woman: 0.91 (0.83, NSR 1.00)<br><u>Dietary total antioxidant:</u> NSR<br>Men: 1 (0.93, 1.07)<br>Woman: 0.93 (0.84, 1.02) |
|                              |                          |                                                                       |                                     |                                                                   | - Decreased risk of PD<br>+ Increased risk of PD<br>NSR No Significant Relation                                                                                                                                                                                                   |

**Table S3: Minerals intake and PD risk:**

| Author                       | Study design             | Population             | Sample size                                                               | Factors studied                    | RR/OR-95%CI                                         | PD risk |
|------------------------------|--------------------------|------------------------|---------------------------------------------------------------------------|------------------------------------|-----------------------------------------------------|---------|
| <b>Chen et al, 2002 [42]</b> | Prospective cohort study | NHS and HPFS cohort    | 47,331 men (HPF), 88563 women (NHS), 210 men PD cases, 184-woman PD cases | Food intake                        | Dairy calcium intake for men: 1.3 (1.0, 1.6)        | NSR     |
| <b>Park et al, 2005 [43]</b> | Prospective cohort study | Honolulu Heart Program | 7,504 men, 128 PD cases                                                   | Milk and calcium intake in midlife | Dairy calcium intake, p= 0.046<br>Non-dairy calcium | +       |

|                                    |                          |                                                                |                                                     |             |                                                                                                |          |
|------------------------------------|--------------------------|----------------------------------------------------------------|-----------------------------------------------------|-------------|------------------------------------------------------------------------------------------------|----------|
|                                    |                          |                                                                |                                                     |             | intake, p= 0.704<br>No available odd ratio                                                     | -        |
| <b>Logroscino et al, 2008 [47]</b> | Prospective cohort study | NHS and HPFS cohort                                            | 47,406 men (HPFS), 76,947 women (NHS), 422 PD cases | Iron intake | Iron: 1.10 (0.74, 1.65)<br>High non-heme iron and low vitamin C intakes: 1.92 (1.14, 3.32)     | NSR<br>+ |
| <b>Cheng et al, 2015 [50]</b>      | Meta-analysis study      | 1 cohort study (US) and 4 case control studies (3 US, 1 Japan) | 126,507 participants                                | Iron intake | Moderate dietary iron intake: 1.08 (0.61, 1.93)<br>high dietary iron intake: 1.03 (0.83, 1.30) | NSR      |

-Decreased risk of PD  
+ Increased risk of PD  
NSR No Significant Relation

**Table S4: Uric Acid level and PD risk:**

| Author                            | Study design                              | Population                                 | Sample size                       | Factors studied                        | RR/OR-95%CI       | PD risk                       |
|-----------------------------------|-------------------------------------------|--------------------------------------------|-----------------------------------|----------------------------------------|-------------------|-------------------------------|
| <b>De Lau et al, 2005 [56]</b>    | Prospective cohort study                  | The Rotterdam Study                        | 4,695 participants, 68 PD cases   | Plasma urate level                     | 0.42 (0.18, 0.96) | <b>Higher plasma urate: -</b> |
| <b>Weisskopf et al, 2007 [58]</b> | Prospective cohort study                  | HPFS cohort                                | 18,000 men, 84 PD cases           | Plasma urate level                     | 0.17 (0.04, 0.69) | <b>Higher plasma urate: -</b> |
| <b>Alonso et al, 2007 [62]</b>    | Case-control nested within a cohort study | General Practice Research Database         | 6,634 controls and 1,052 PD cases | History of Gout                        | 0.69 (0.48, 0.99) | <b>Gout: -</b>                |
| <b>Gao et al, 2008 [59]</b>       | Prospective cohort study                  | HPFS cohort                                | 47,406 men                        | Diet that increases plasma urate level | 0.47 (0.30, 0.74) | <b>Higher plasma urate: -</b> |
| <b>Chen et al, 2009 [57]</b>      | Prospective cohort study                  | Atherosclerosis Risk in Communities (ARIC) | 95 PD cases                       | Plasma urate level                     | 0.4 (0.2, 0.8)    | <b>Higher plasma urate: -</b> |

|                                  |                                           |                                   |                                                                                                        |                       |                                                                                                                                       |                                                                                                     |
|----------------------------------|-------------------------------------------|-----------------------------------|--------------------------------------------------------------------------------------------------------|-----------------------|---------------------------------------------------------------------------------------------------------------------------------------|-----------------------------------------------------------------------------------------------------|
| <b>O'Reilly et al, 2010 [63]</b> | Case-control nested within a cohort study | NHS cohort                        | <u>Cohort study:</u><br>5888-woman, 214 PD cases<br><u>Case-control:</u><br>105 PD cases, 518 controls | Plasma urate level    | 1.33 (0.69, 2.57)                                                                                                                     | <b>NSR</b>                                                                                          |
| <b>Jain et al, 2011 [64]</b>     | Prospective cohort study                  | Cardiovascular Health Study (CHS) | 5,749 participants, 214 PD cases                                                                       | Plasma urate level    | Urate > 500 µmol/l<br>Men: 1.55 (0.72–3.32)<br>Woman: 0.75 (0.18, 3.16)                                                               | <b>NSR</b>                                                                                          |
| <b>Shen et al, 2013 [60]</b>     | Meta-analysis study                       | 6 selected studies                | 1276 controls, 1217 PD cases                                                                           | Serum uric acid level | No available odd ratio                                                                                                                | <b>Lower serum uric acid: +</b>                                                                     |
| <b>Gao et al, 2016 [65]</b>      | Nested case-control study                 | 3 ongoing US cohorts              | 1,267 control, 388 PD cases                                                                            | Plasma urate level    | Men: 0.63 (0.42, 0.95)<br>Woman: 1.04 (0.61, 1.78)                                                                                    | <b>Men: higher plasma urate: -</b><br><b>Woman: NSR</b>                                             |
| <b>Wen et al, 2017 [61]</b>      | Meta-analysis study                       | 13 selected studies               | 2267 controls, 2379 PD cases                                                                           | Serum uric acid level | Serum uric acid levels in PD patients were lower compared to sex and age-matched healthy controls (p<0.001)<br>No available odd ratio | <b>Lower serum uric acid: +</b>                                                                     |
|                                  |                                           |                                   |                                                                                                        |                       |                                                                                                                                       | <b>-Decreased risk of PD</b><br><b>+ Increased risk of PD</b><br><b>NSR No Significant Relation</b> |

**Table S5: Dairy product intake and PD risk:**

| <b>Author</b>           | <b>Study design</b> | <b>Population</b> | <b>Sample size</b> | <b>Factors studied</b> | <b>RR/OR-95%CI</b> | <b>PD risk</b> |
|-------------------------|---------------------|-------------------|--------------------|------------------------|--------------------|----------------|
| <b>Chen et al, 2002</b> | Prospective cohort  | NHS and           | 51,529 men and     | Food intake            | Dairy intake:      |                |

|                                              |                             |                                                                                 |                                                                                  |                                       |                                                                                                |                              |
|----------------------------------------------|-----------------------------|---------------------------------------------------------------------------------|----------------------------------------------------------------------------------|---------------------------------------|------------------------------------------------------------------------------------------------|------------------------------|
| [42]                                         | study                       | HPFS cohort                                                                     | 121,700 women,<br>210 PD men cases<br>and 184 PD women<br>cases                  |                                       | Men: 1.8 (1.2, 2.8)<br>Women: 1.1 (0.7,<br>1.7)                                                | +<br><br><b>NSR</b>          |
| <b>Park et al, 2005</b><br>[43]              | Prospective cohort<br>study | Honolulu Heart<br>Program                                                       | 7,504 men, 128 PD<br>cases                                                       | Milk and calcium<br>intake in midlife | 2.6 (1.1,6.4)                                                                                  | +                            |
| <b>Chen et al, 2007</b><br>[70]              | Prospective cohort<br>study | American Cancer<br>Society's Cancer<br>Prevention Study II<br>Nutrition Cohort. | 57,689 men and<br>73,175 women, 250<br>men PD cases and<br>138 women PD<br>cases | Intake of dairy<br>products           | 1.6 (1.1, 2.2)                                                                                 | +                            |
| <b>Kyrozis et al, 2013</b><br>[14]           | Prospective cohort<br>study | EPIC–Greece cohort                                                              | 26,173 participants,<br>120 PD cases                                             | Dietary and<br>lifestyle variables    | Dairy total: 1.02<br>(0.84 1.26)<br>Milk: 1.19 (1.02,<br>1.38)<br>Yogurt: 0.77 (0.58,<br>1.02) | +<br><br>+<br><br><b>NSR</b> |
| <b>Sääksjärvi et al,</b><br><b>2013 [72]</b> | Prospective cohort<br>study | Finnish Mobile Clinic<br>Health<br>Examination Survey<br>(FMC)                  | 4524 participants,<br>85 PD cases                                                | Food group and<br>diet quality        | Consumption of<br>milk (highest<br>tertile)for woman:<br>3.31 (1.10, 9.93)                     | +                            |
| <b>Jiang et al, 2014</b><br>[73]             | Meta-analysis study         | Seven results<br>from prospective<br>studies                                    | 304,193<br>participants, 1,083<br>PD cases                                       | Dairy foods                           | 1.40 (1.20, 1.63)                                                                              | +                            |
| <b>Abbott et al, 2016</b><br>[67]            | Prospective cohort<br>study | Honolulu-Asia Aging<br>Study                                                    | 449 men<br>participants,<br>postmortem<br>examinations                           | Midlife milk intake                   | 0.82 (No available<br>CI)                                                                      | <b>NSR</b>                   |
| <b>Hughes et al, 2017</b><br>[71]            | Prospective cohort<br>study | NHS and<br>HPFS cohort                                                          | NHS: 80,736<br>participants<br>HPFS: 48,610<br>1,036 PD cases                    | Intake of dairy<br>products           | Low fat dairy: 1.34<br>(1.01, 1.79)                                                            | +                            |

+ Increased risk of PD  
NSR No Significant Relation

**Table S6: Consumption of alcoholic beverages and PD risk:**

| <b>Author</b>                    | <b>Study design</b>                       | <b>Population</b>                               | <b>Sample size</b>                                  | <b>Factors studied</b>                                            | <b>RR/OR-95%CI</b>                                                                                                             | <b>PD risk</b> |
|----------------------------------|-------------------------------------------|-------------------------------------------------|-----------------------------------------------------|-------------------------------------------------------------------|--------------------------------------------------------------------------------------------------------------------------------|----------------|
| <b>Paganini-Hill, 2001 [36]</b>  | Nested case-control study                 | Leisure World Laguna Hills, southern California | 13,979 participants, 395 PD cases and 2,320 control | Etiologic factors                                                 | 2+ alcoholic drinks: 0.77 (0.58, 1.03)                                                                                         | -              |
| <b>Hernán et al, 2003 [81]</b>   | Prospective cohort study                  | NHS and HPFS cohort                             | 173,229 participants, 415 PD cases                  | Alcoholic beverages and another potentially habituating behaviour | Beer: 0.70 (0.5, 0.9)                                                                                                          | -              |
| <b>Hernán et al, 2004 [78]</b>   | Case-control nested within a cohort study | General Practice Research Database (GPRD)       | 10,123 controls, 1,019 PD cases                     | Alcoholism                                                        | 1.09 (0.67, 1.78)                                                                                                              | <b>NSR</b>     |
| <b>Kamel et al, 2007 [77]</b>    | Case-control nested within a cohort study | Agricultural Health Study                       | 55,931 participants, 78 PD cases                    | Pesticide exposure                                                | 1.10 (0.6, 1.8)                                                                                                                | <b>NSR</b>     |
| <b>Tan et al, 2008 [80]</b>      | Prospective cohort study                  | Singapore Chinese Health Study                  | 63,257 participants, 157 PD cases                   | Coffee, black tea, and green tea consumption                      | Drinkers: 0.58 (0.30, 1.11)                                                                                                    | <b>NSR</b>     |
| <b>Palacios et al, 2012 [79]</b> | Prospective cohort study                  | Cancer Prevention Study II Nutrition Cohort     | 132,403 participants, 605 PD cases                  | Alcohol consumption                                               | Men consuming $\geq 30$ grams alcohol/day: 1.29 (0.90, 1.86)<br>Woman consuming $\geq 15$ grams alcohol/day: 0.77 (0.41, 1.45) | <b>NSR</b>     |
| <b>Noyce et al, 2012 [85]</b>    | Meta-analysis study                       | 22 selected studies                             | Not available                                       | Association between PD and different risk factors                 | Alcohol: 0.9 (0.84, 0.96)                                                                                                      | -              |
| <b>Eriksson et al, 2013 [83]</b> | Prospective cohort study                  | Swedish National Inpatient Register             | 602,930 participants, 1,741 PD cases                | Association between diagnosed alcohol use                         | 1.38 (1.25, 1.53)                                                                                                              | +              |

|                                                                                                                    |                          |                                                                                           |                                      |                                                                 |                                                       |        |
|--------------------------------------------------------------------------------------------------------------------|--------------------------|-------------------------------------------------------------------------------------------|--------------------------------------|-----------------------------------------------------------------|-------------------------------------------------------|--------|
|                                                                                                                    |                          |                                                                                           |                                      | disorders                                                       |                                                       |        |
| <b>Liu et al, 2013 [82]</b>                                                                                        | Prospective cohort study | NIH-AARP Diet and Health Study                                                            | 306,895 participants, 1,113 PD cases | Total alcohol consumption, specific types of alcoholic beverage | Beer: 0.79 (0.68, 0.92)<br>Liquor: 1.35 (1.02, 1.80)  | -<br>+ |
| <b>Sääksjärvi et al, 2014 [84]</b>                                                                                 | Prospective cohort study | Finnish Mobile Clinic Health Examination Survey                                           | 6,715 participants, 101 PD cases     | The prediction of various lifestyle factors                     | <5 g/day of alcohol intake: 1.94 (1.09, 3.47)         | +      |
| <b>Zhang et al, 2014 [86]</b>                                                                                      | Meta-analysis study      | 32 studies: 8 prospective, 17 matched case-control and 7 unmatched case-control involving | 677,550 participants, 9994 PD cases  | Alcohol consumption                                             | Alcohol: 0.78 (0.67, 0.92)<br>Beer: 0.59 (0.39, 0.90) | -<br>- |
| <p style="text-align: right;">-Decreased risk of PD<br/>+ Increased risk of PD<br/>NSR No Significant Relation</p> |                          |                                                                                           |                                      |                                                                 |                                                       |        |

**Table S7: Coffee, tea and other polyphenols containing food items and PD risk:**

| Author                            | Study design             | Population                 | Sample size                                                          | Factors studied                            | RR/OR-95%CI                                                                              | PD risk |
|-----------------------------------|--------------------------|----------------------------|----------------------------------------------------------------------|--------------------------------------------|------------------------------------------------------------------------------------------|---------|
| <b>Ross et al, 2000 [101]</b>     | Prospective cohort study | Honolulu Heart Program     | 8,006 Japanese-American men participants, 102 PD cases               | Coffee and dietary caffeine intake         | Higher coffee and caffeine intake decrease PD risk (p < 0.001)<br>No available odd ratio | -       |
| <b>Ascherio et al, 2001 [104]</b> | Prospective cohort study | NHS and HPFS cohort        | 135,916 participants, 288 PD cases                                   | Consumption of coffee                      | Men: 0.42 (0.23, 0.78)                                                                   | -       |
| <b>Ascherio et al, 2004 [103]</b> | Prospective cohort study | Cancer Prevention study II | Over 1 million participants, 909 PD men cases and 340 PD women cases | Caffeine consumption and gender difference | ≥4 cups of coffee/day for women using postmenopausal estrogen : 0.47                     | -       |

|                                    |                          |                                                                                            |                                    |                                              |                                                                                                                                   |                 |
|------------------------------------|--------------------------|--------------------------------------------------------------------------------------------|------------------------------------|----------------------------------------------|-----------------------------------------------------------------------------------------------------------------------------------|-----------------|
|                                    |                          |                                                                                            |                                    |                                              | (0.27, 0.80)                                                                                                                      |                 |
| <b>Hu et al, 2007 [102]</b>        | Prospective cohort study | Finnish population                                                                         | 29,335 participants, 200 PD cases  | Coffee and tea consumption                   | 1-4 cups of coffee/day: 0.53 (0.31, 0.92)<br>≥ 5 cups of coffee/day : 0.40 (0.23, 0.71)<br>≥ 3 cups of tea/day: 0.41 (0.20, 0.83) | -               |
| <b>Tan et al, 2008 [80]</b>        | Prospective cohort study | Singapore Chinese Health Study                                                             | 63,257 participants, 157 PD cases  | Coffee, black tea, and green tea consumption | Caffeine: 0.55 (95%: 0.35, 0.88)<br>Black tea: 0.29 (95%: 0.13, 0.67)                                                             | -<br>-          |
| <b>Costa et al, 2010 [105]</b>     | Meta-analysis study      | 26 studies: 7 cohort, 2 nested case-control, 16 case-control, and 1 cross-sectional study. | Not available                      | Caffeine/coffee consumption                  | 300 mg increase in caffeine intake: 0.76 (0.72, 0.80)                                                                             | -               |
| <b>Li et al, 2012 [111]</b>        | Meta-analysis study      | 8 articles published up to 2010                                                            | 4250 controls, 1418 PD cases       | Tea drinking                                 | 0.85 (0.74, 0.98)                                                                                                                 | -               |
| <b>Gao et al, 2012 [116]</b>       | Prospective cohort study | NHS and HPFS cohort                                                                        | 129,617 participants, 805 PD cases | Flavonoid intake                             | Anthocyanins: 0.76 (0.61, 0.96)<br>Flavonoids: 0.77 (0.46, 1.28)                                                                  | -<br><b>NSR</b> |
| <b>Liu et al, 2012 [82]</b>        | Prospective cohort study | National Institutes of Health (NIH)-AARP Diet and Health Study                             | 304,980 participants, 940 PD cases | Caffeine intake                              | Men: 0.75 (0.60, 0.94)<br>Woman: 0.60 (0.39, 0.91)                                                                                | -<br>-          |
| <b>Sääksjärvi et al, 2013 [72]</b> | Prospective cohort study | Finnish Mobile Clinic Health Examination Survey (FMC)                                      | 4524 participants, 85 PD cases     | Food group or diet                           | Diet quality index: Men: 1.83 (0.65, 5.18)<br>Woman: 0.97 (0.38, 2.48)                                                            | <b>NSR</b>      |

-Decreased risk of PD  
+ Increased risk of PD  
NSR No Significant Relation

**Table S8: Dietary patterns and PD risk:**

| Author                             | Study design             | Population                                            | Sample size                            | Factors studied                                                                        | RR/OR-95%CI                                                            | PD risk |
|------------------------------------|--------------------------|-------------------------------------------------------|----------------------------------------|----------------------------------------------------------------------------------------|------------------------------------------------------------------------|---------|
| <b>Gao et al, 2007 [126]</b>       | Prospective cohort study | Health Professional Follow-up Study                   | 131,368 participants, 508 PD cases     | Dietary patterns                                                                       | Mediterranean diet pattern: 0.75 (0.57, 1.00)                          | -       |
| <b>Sofi et al, 2010 [130]</b>      | Meta-analysis study      | 7 prospective studies                                 | 136,235 participants and 1074 PD cases | Effects of adherence to the Mediterranean diet on health status                        | 0.87 (0.81, 0.94)                                                      | -       |
| <b>Sääksjärvi et al, 2013 [72]</b> | Prospective cohort study | Finnish Mobile Clinic Health Examination Survey (FMC) | 4524 participants, 85 PD cases         | Food group and diet quality                                                            | Diet quality index: Men: 1.83 (0.65, 5.18)<br>Woman: 0.97 (0.38, 2.48) | NSR     |
| <b>Agarwal et al, 2018 [129]</b>   | Prospective cohort study | Rush Memory and Aging Project (MAP)                   | 706 participants, 302 PD cases         | MIND diet                                                                              | 0.89 (0.83, 0.96)                                                      | -       |
| <b>Maraki et al, 2018 [128]</b>    | Prospective cohort study | HELIAD (Greece)                                       | 1,765 participants, 600 PD cases       | Probability of prodromal PD and possible association with Mediterranean diet adherence | Adherence to the Mediterranean diet, p<0.001<br>No available odd ratio | -       |

-Decreased risk of PD  
+ Increased risk of PD  
NSR No Significant Relation

**Table S9: Microbiota and PD prevalence:**

| Author                                | Study design       | Population                                                                                                         | Sample size                | Factors studied | Microbiota variation                                                                                                                                                                            | PD risk |
|---------------------------------------|--------------------|--------------------------------------------------------------------------------------------------------------------|----------------------------|-----------------|-------------------------------------------------------------------------------------------------------------------------------------------------------------------------------------------------|---------|
| <b>Scheperjans et al, 2015 [148]</b>  | Case-control study | Hospital District of Helsinki and Uusimaa                                                                          | 72 control, 72 PD cases    | Gut microbiota  | <i>Prevotellaceae</i><br>Decreased by 77.6%<br><b>Increased content</b> of <i>Enterobacteriaceae</i>                                                                                            | +       |
| <b>Hasegawa et al, 2015 [149]</b>     | Case-control study | Outpatient clinic of Nagoya University Hospital and the Aichi Chapter of the Japan Parkinson's Disease Association | 36 control, 52 PD cases    | Gut microbiota  | <b>Decreased content</b> <i>Clostridium coccoides</i> group,<br><i>Bacteroides fragilis</i> and <i>Prevotella</i><br><b>Increased content</b> of <i>Lactobacillus</i>                           | +       |
| <b>Keshavarzian et al, 2015 [140]</b> | Case-control study | Rush University Medical Center (RUMC; Chicago, IL)                                                                 | 34 control, 38 PD cases    | Gut microbiota  | <b>Decreased content</b> of <i>Faecalibacterium</i><br><b>Increased content</b> <i>Proteobacteria</i>                                                                                           | +       |
| <b>Unger et al, 2016 [141]</b>        | Case-control study | German population                                                                                                  | 34 control, 34 PD cases    | Gut microbiota  | <b>Decreased content</b> of fecal SCFA concentrations<br><i>Bacteroidetes</i> and <i>Prevotellaceae</i><br><b>Increased content</b> of <i>enterobacteriaceae</i> , <i>bifidobacterium</i> genus | +       |
| <b>Hill-Burns et al, 2017 [147]</b>   | Case-control study | NeuroGenetics Research Consortium in Seattle, Washington; Atlanta, Georgia; and                                    | 136 controls, 212 PD cases | Gut microbiota  | <b>Increased content</b> of <i>Bifidobacteriaceae</i> and <i>Lactobacillaceae</i>                                                                                                               | +       |

|                                  |                    |                                                   |                          |                |                                                                                                                                                                                                                                            |                                                                                |
|----------------------------------|--------------------|---------------------------------------------------|--------------------------|----------------|--------------------------------------------------------------------------------------------------------------------------------------------------------------------------------------------------------------------------------------------|--------------------------------------------------------------------------------|
|                                  |                    | Albany, New York                                  |                          |                |                                                                                                                                                                                                                                            |                                                                                |
| <b>Hopfner et al, 2017 [135]</b> | Case-control study | German population                                 | 29 controls, 29 PD cases | Gut microbiota | <b>Increased content of</b><br><i>Lactobacillaceae</i> ,<br><i>Barnesiellaceae</i> and<br><i>Enterococcaceae</i>                                                                                                                           | +                                                                              |
| <b>Petrov et al, 2017 [139]</b>  | Case-control study | Russian population                                | 66 controls, 89 PD cases | Gut microbiota | <b>Decreased content</b><br>of <i>Bacteroides</i> ,<br><i>Prevotella</i> ,<br><i>Faecalibacterium</i><br><b>Increased content of</b><br><i>Lactobacillus</i> ,<br><i>Bifidobacterium</i>                                                   | +                                                                              |
| <b>Bedarf et al, 2017 [156]</b>  | Case-control study | Department of Neurology at the University of Bonn | 28 controls, 31 PD cases | Gut microbiota | <b>Decreased content</b><br>of<br><i>Prevotella copri</i><br><b>Increased content of</b><br><i>Akkermansia</i><br><i>muciniphila</i> and<br>unclassified<br><i>Firmicutes</i>                                                              | +                                                                              |
| <b>Li et al, 2017 [142]</b>      | Case-control study | Chinese population                                | 14 controls, 24 PD cases |                | <b>Decreased content</b><br>of<br><i>Blautia</i> ,<br><i>Faecalibacterium</i><br>and <i>Ruminococcus</i><br><b>Increased content</b><br><i>Escherichia-Shigella</i><br><i>Streptococcus</i> ,<br><i>Proteus</i> and<br><i>Enterococcus</i> | +                                                                              |
|                                  |                    |                                                   |                          |                |                                                                                                                                                                                                                                            | -Decreased risk of PD<br>+ Increased risk of PD<br>NSR No Significant Relation |
